# Supplementary material for: Population Differentiation of Southern Indian Male Lineages Correlates with Agricultural Expansions Predating the Caste System
Source: PLoS One. 2012 Nov 28;7(11):e50269. doi: 10.1371/journal.pone.0050269 (PMC3508930; doi:10.1371/journal.pone.0050269)
Supplement: Table S3 — List of population codes and their publication references used in Figure S1. (XLS) [file pone.0050269.s007.xls]

## Sheet: Table S3
Table S3. List of population codes and their publication references used in Figure S1.
S.No	Population	Language Family	Province	Region	Sample Code for PCA	Sample size	Reference
1	Asur	Austo Asiatic	Jharkhand	E.India	JHA1	55	Kumar etal 2007
2	Birjia	Austo Asiatic	Jharkhand	E.India	JHA2	24	Kumar etal 2007
3	Korwa	Austo Asiatic	Jharkhand	E.India	JHA3	42	Kumar etal 2007
4	Savar	Austo Asiatic	Jharkhand	E.India	JHA4	47	Kumar etal 2007
5	Kharia	Austo Asiatic	Jharkhand	E.India	JHA5	46	Kumar etal 2007, Sahoo etal 2006
6	Munda	Austo Asiatic	Jharkhand	E.India	JHA6	60	Kumar etal 2007, Sahoo etal 2006
7	Korku	Austo Asiatic	Maharashtra	E.India	MAH1	59	Kumar etal 2007
8	Khasi	Austo Asiatic	Meghalaya	N.E.India	NE1	92	Kumar etal 2007
9	Juang	Austo Asiatic	Orissa	E.India	ORI3	59	Sahoo etal 2006, Kumar etal 2007
10	Ho	Austo Asiatic	Orissa	E.India	ORI5	116	Sengupta etal 2006, Kumar etal 2007, Sahoo etal 2006
11	Mudi	Austo Asiatic	West Bengal	E.India	WB2	37	Kumar etal 2007
12	Mahali	Austo Asiatic	West Bengal	E.India	WB3	38	Kumar etal 2007, Sahoo etal 2006
13	Lodha	Austo Asiatic	West Bengal	E.India	WB6	71	Sengupta etal 2006, Kumar etal 2007
14	Lebanese	Afro Asiatic	Lebanon	MIDDLE EAST	LEBN1	50	Wells et al 2001
15	Arab/Bukhara	Afro Asiatic	Uzbekistan	CENTRAL ASIA	UZB1	42	Wells et al 2001
16	Uighur	Altaic	Kazakstan	CENTRAL ASIA	KAZ1	41	Wells et al 2001
17	Kyrozy	Altaic	Kyrgyzstan	CENTRAL ASIA	KYRGZ2	52	Wells et al 2001
18	Tuvinian	Altaic	SIBERIA	SIBERIA/EAST ASIA	SIB1	42	Wells et al 2001
19	Turkmen	Altaic	Turkmenistan	CENTRAL ASIA	TRKM2	30	Wells et al 2001
20	Crimean Tatar	Altaic	Uzbekistan	CENTRAL ASIA	UZB2	22	Wells et al 2001
21	Karakalpak	Altaic	Uzbekistan	CENTRAL ASIA	UZB3	44	Wells et al 2001
22	Uzbek/Bukhara	Altaic	Uzbekistan	CENTRAL ASIA	UZB6	58	Wells et al 2001
23	Uzbek/Kashkadarya	Altaic	Uzbekistan	CENTRAL ASIA	UZB7	19	Wells et al 2001
24	Uzbek/Surkhandarya	Altaic	Uzbekistan	CENTRAL ASIA	UZB8	68	Wells et al 2001
25	Burusho	Burushaski unclassifIndo Europiand	Pakistan	PAK	PAK3	20	Sengupta etal 2006
26	Koraga	Dravidian	Andhra Pradesh	S.India	AP1	33	Cordaux 2004
27	Konda Reddy	Dravidian	Andhra Pradesh	S.India	AP10	30	Sengupta etal 2006
28	Koya Dora	Dravidian	Andhra Pradesh	S.India	AP11	27	Sengupta etal 2006
29	Andh	Dravidian	Andhra Pradesh	S.India	AP12	54	Thanseem etal 2006
30	Koya	Dravidian	Andhra Pradesh	S.India	AP2	41	Kivisild etal 2003
31	Yerava	Dravidian	Andhra Pradesh	S.India	AP3	41	Cordaux 2004
32	Kappu naidu	Dravidian	Andhra Pradesh	S.India	AP4	18	Sahoo etal 2006
33	Komati	Dravidian	Andhra Pradesh	S.India	AP5	20	Sahoo etal 2006
34	Naikpod Gond	Dravidian	Andhra Pradesh	S.India	AP6	18	Sahoo etal 2006
35	Raju	Dravidian	Andhra Pradesh	S.India	AP7	19	Sahoo etal 2006
36	Yerkual	Dravidian	Andhra Pradesh	S.India	AP8	18	Sahoo etal 2006
37	Valayar	Dravidian	Tamil Nadu	S.India	AW1	95	Current Paper
38	Tamil Jains	Dravidian	Tamil Nadu	S.India	AW2	100	Current Paper
39	Ezhava	Dravidian	Tamil Nadu	S.India	AW3	95	Current Paper
40	Mukkuvar	Dravidian	Tamil Nadu	S.India	AW4	17	Current Paper
41	Yadhava	Dravidian	Tamil Nadu	S.India	DLF1	107	Current Paper
42	Vanniyar	Dravidian	Tamil Nadu	S.India	DLF2	21	Current Paper
43	VanniyarNTN	Dravidian	Tamil Nadu	S.India	DLF3	96	Current Paper
44	Nadar TNV	Dravidian	Tamil Nadu	S.India	DLF4	59	Current Paper
45	Cape Nadar	Dravidian	Tamil Nadu	S.India	DLF5	98	Current Paper
46	Piramalai Kallar	Dravidian	Tamil Nadu	S.India	DLF6	53	Current Paper
47	Maravar	Dravidian	Tamil Nadu	S.India	DLF7	80	Current Paper
48	Kanikaran	Dravidian	Tamil Nadu	S.India	HTC1	17	Current Paper
49	Thoda	Dravidian	Tamil Nadu	S.India	HTC2	26	Current Paper
50	Kota	Dravidian	Tamil Nadu	S.India	HTC3	62	Current Paper
51	Paniya	Dravidian	Tamil Nadu	S.India	HTF1	72	Current Paper
52	Paliyan	Dravidian	Tamil Nadu	S.India	HTF2	95	Current Paper
53	Pulayar	Dravidian	Tamil Nadu	S.India	HTF3	63	Current Paper
54	Irula	Dravidian	Tamil Nadu	S.India	HTF4	80	Current Paper
55	Kadar	Dravidian	Tamil Nadu	S.India	HTF5	28	Current Paper
56	Betta Kurumba	Dravidian	Tamil Nadu	S.India	HTK1	17	Current Paper
57	Kattunaickan	Dravidian	Tamil Nadu	S.India	HTK2	46	Current Paper
58	Kurumba	Dravidian	Tamil Nadu	S.India	HTK3	35	Current Paper
59	Mullukurumba	Dravidian	Tamil Nadu	S.India	HTK4	29	Current Paper
60	Oraon	Dravidian	Jharkhand	E.India	JHA7	100	Kumar etal 2007, Sahoo etal 2006
61	Muria	Dravidian	Orissa	C.India	ORI4	20	Sengupta etal 2006
62	Brahui	Dravidian	Pakistan	PAK	PAK2	25	Sengupta etal 2006
63	Parayar NTN	Dravidian	Tamil Nadu	S.India	SC1	52	Current Paper
64	Parayar	Dravidian	Tamil Nadu	S.India	SC2	24	Current Paper
65	Pallar	Dravidian	Tamil Nadu	S.India	SC3	51	Current Paper
66	Paravar	Dravidian	Tamil Nadu	S.India	SC4	27	Current Paper
67	Sinhalese	Dravidian	Cyelone	SriLanka	SL1	39	Kivisild etal 2003
68	Iyer	Dravidian	Tamil Nadu	S.India	TN1	29	Sengupta etal 2006
69	Kurumba	Dravidian	Tamil Nadu	S.India	TN2	19	Sengupta etal 2006
70	Iyengar	Dravidian	Tamil Nadu	S.India	TN3	47	Sengupta etal 2006, Sahoo etal 2006
71	Irula	Dravidian	Tamil Nadu	S.India	TN4	40	Sengupta etal 2006, Sahoo etal 2006
72	Pallan	Dravidian	Tamil Nadu	S.India	TN5	44	Sengupta etal 2006, Sahoo etal 2006
73	Kallar	Dravidian	Tamil Nadu	S.India	TN6	93	Wells et al 2001, Sahoo etal 2006
74	Lambadi	Indo Europian	Andhra Pradesh	S.India	AP9	53	Sahoo etal 2006, Kivisild etal 2003
75	Bihar Brahmins	Indo Europian	Bihar	E.India	BIH1	56	Sahoo etal 2006, Sharma et al 2009
76	Sourashtra	Indo Europian	TN	S.India	BRH1	40	Current Paper
77	Brahacharanam Brahmin	Indo Europian	TN	S.India	BRH2	21	Current Paper
78	Iyengar Brahmin	Indo Europian	TN	S.India	BRH3	11	Current Paper
79	VadamaBrahmin	Indo Europian	TN	S.India	BRH4	63	Current Paper
80	KonkaBr.	Indo Europian	Goa	W.India	Goa1	43	Kivisild etal 2003
81	Gujarat Brahmins	Indo Europian	Gujarat	W.India	Guj1	64	Sharma etal 2009
82	Bhils	Indo Europian	Gujarat	W.India	Guj2	22	Sharma etal 2009
83	Gujarat	Indo Europian	Gujarat	W.India	Guj3	29	Kivisild etal 2003
84	Esfahan	Indo Europian	Iran	MIDDLE EAST	Iran1	16	Wells et al 2001
85	Shiraz	Indo Europian	Iran	MIDDLE EAST	Iran2	12	Wells et al 2001
86	Tehran	Indo Europian	Iran	MIDDLE EAST	Iran3	24	Wells et al 2001
87	J&K Kashmir Gujars	Indo Europian	Jammu and Kashmir	N.India	J&K1	49	Sharma etal 2009
88	J&K Kashmiri Pandits	Indo Europian	Jammu and Kashmir	N.India	J&K2	51	Sharma etal 2009
89	Desasath Brahmin	Indo Europian	Maharashtra	W.India	MAH2	16	Sahoo etal 2006
90	Kathari	Indo Europian	Maharashtra	W.India	MAH3	19	Sahoo etal 2006
91	Halba	Indo Europian	Maharashtra	C	MAH4	21	Sengupta etal 2006
92	Maratha	Indo Europian	Maharashtra	W.India	MAH5	36	Sengupta etal 2006, Sahoo etal 2006
93	Madhya Pradesh Brahmins	Indo Europian	Madhya Pradesh	C.India	MP1	42	Sharma etal 2009
94	Karan	Indo Europian	Orissa	E.India	ORI1	18	Sahoo etal 2006
95	Oriya Brahmin	Indo Europian	Orissa	E.India	ORI2	24	Sahoo etal 2006
96	Balochi	Indo Europian	Pakistan	PAK	PAK1	25	Sengupta etal 2006
97	Hazara	Indo Europian	Pakistan	PAK	PAK4	25	Sengupta etal 2006
98	Kalash	Indo Europian	Pakistan	PAK	PAK5	20	Sengupta etal 2006
99	Makrani	Indo Europian	Pakistan	PAK	PAK6	20	Sengupta etal 2006
100	Pathan	Indo Europian	Pakistan	PAK	PAK7	21	Sengupta etal 2006
101	Sindhi	Indo Europian	Pakistan	PAK	PAK8	21	Sengupta etal 2006
102	Punjab Brahmin	Indo Europian	Punjab	N.India	PUN1	49	Sharma etal 2009
103	Punjab	Indo Europian	Punjab	N.India	PUN2	66	Kivisild etal 2003
104	Rajput	Indo Europian	Rajastan	N.India	RAJ1	29	Sengupta etal 2006
105	Pornor	Indo Europian	RUSSIA	RUSSIA	RUS1	28	Wells et al 2001
106	Bartangi	Indo Europian	Tajikistan	CENTRAL ASIA	TAJK1	30	Wells et al 2001
107	Ishkashimi	Indo Europian	Tajikistan	CENTRAL ASIA	TAJK2	25	Wells et al 2001
108	Shugnan	Indo Europian	Tajikistan	CENTRAL ASIA	TAJK3	44	Wells et al 2001
109	Tajik/Dushanbe	Indo Europian	Tajikistan	CENTRAL ASIA	TAJK4	16	Wells et al 2001
110	Tajik/Khojant	Indo Europian	Tajikistan	CENTRAL ASIA	TAJK5	22	Wells et al 2001
111	Yagnobi	Indo Europian	Tajikistan	CENTRAL ASIA	TAJK6	31	Wells et al 2001
112	Kurd	Indo Europian	Turkmenistan	CENTRAL ASIA	TRKM1	17	Wells et al 2001
113	British	Indo Europian	BRITAIN	WESTERN EUROPE	UK1	25	Wells et al 2001
114	Uttar Pradesh Brahmin	Indo Europian	Uttar Pradesh	N.India	UP1	31	Sharma etal 2009
115	Sinte Romani	Indo Europian	Uzbekistan	CENTRAL ASIA	UZB4	15	Wells et al 2001
116	Tajik/Samarkand	Indo Europian	Uzbekistan	CENTRAL ASIA	UZB5	40	Wells et al 2001
117	Orkney	Indo Europian	W.EUOPE	WESTERN EUROPE	W.ERP1	26	Wells et al 2001
118	W.Bengal	Indo Europian	West Bengal	E.India	WB1	31	Kivisild etal 2003
119	Karmali	Indo Europian	West Bengal	E.India	WB4	16	Sahoo etal 2006
120	Kora	Indo Europian	West Bengal	E.India	WB5	17	Sahoo etal 2006
121	WB.Brahmin	Indo Europian	West Bengal	E.India	WB7	49	Sharma etal 2009, Sengupta etal 2006
122	Mien-FuChuan_Hmong-Mien	Sino Tibetan	CHINA	China	CHINA1	11	Rui-Jing Gan et al 2008
123	Pinghua-HeZhou	Sino Tibetan	CHINA	China	CHINA2	15	Rui-Jing Gan et al 2008
124	Pinghua-LuoCheng	Sino Tibetan	CHINA	China	CHINA3	21	Rui-Jing Gan et al 2008
125	Zhuang-Northern	Sino Tibetan	CHINA	China	CHINA4	21	Rui-Jing Gan et al 2008
126	Dungan	Sino Tibetan	Kyrgyzstan	CENTRAL ASIA	KYRGZ1	40	Wells et al 2001
127	Garo	Tibeto Burman	Meghalaya	NE.India	NE2	33	Kumar etal 2007
128	Jamatia	Tibeto Burman	Tripura	NE.India	NE3	30	Sengupta etal 2006
					Total	5194
